# Supplementary material for: Light-driven hydrogen evolution with a nickel thiosemicarbazone redox catalyst featuring Ni⋯H interactions under basic conditions
Source: Royal Society of Chemistry journal article supplement (doi:10.1039/c4nj01540a), 2014-11-26
Supplement: c4nj01540a1.pdf [file c4nj01540a1.pdf]

## Supporting Information

# Light-driven Hydrogen Evolution with A Nickel Thiosemicarbazone Redox Catalyst Featuring Ni...H interactions under Basic Conditions

Xu Jing, Pengyan Wu, Xin Liu, Linlin Yang, Cheng He\* and Chunying Duan

State Key Laboratory of Fine Chemicals, Dalian University of Technology, Dalian, 116023, P. R. China E-mail: hecheng@dlut.edu.cn

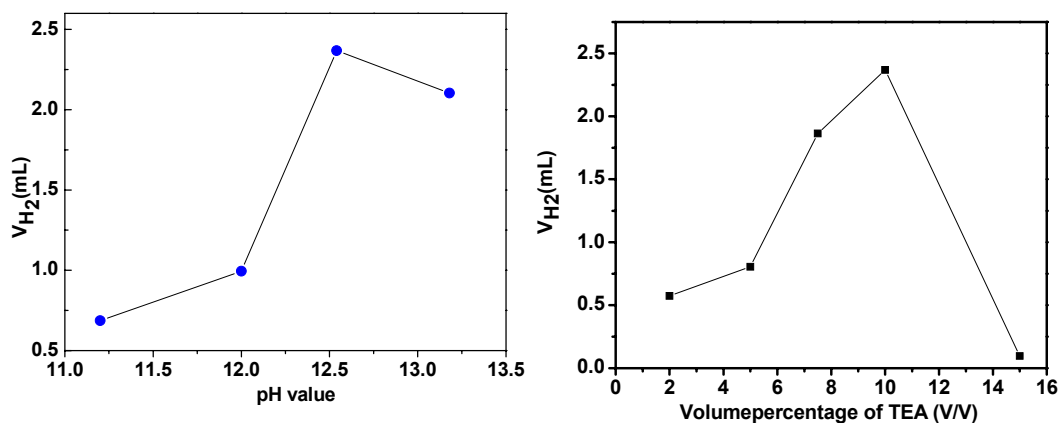

**Figure S1** Photocatalytic H<sub>2</sub> evolution in 1:1 EtOH/H<sub>2</sub>O of the systems containing Co-thiop (10.0 μM), Fl (2.0 mM), TEA (10% v/v) at different pH values (left picture) and of the systems containing Co-thiop(10.0 μM), Fl (2.0 mM) at pH 12.5 with various TEA concentration (right one)

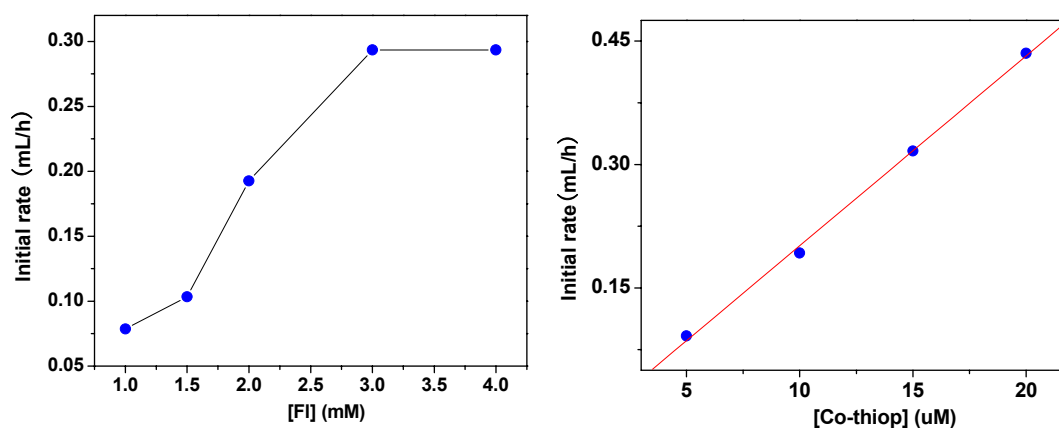

**Figure S2** Initial rates of H<sub>2</sub> production in EtOH/H<sub>2</sub>O (1:1) at pH 12.5 with 10% of TEA of systems containing Co-**thiop** (10.0 μM) with the concentration of Fl was 1.0 mM, 1.5 mM, 2.0 mM, 3.0 mM and 4.0 mM, respectively (left picture); and of the systems containing Fl (2.0 mM) with the concentration of Co-**thiop** was 5.0μM, 10.0μM, 15.0μM and 20.0μM, respectively (right one).

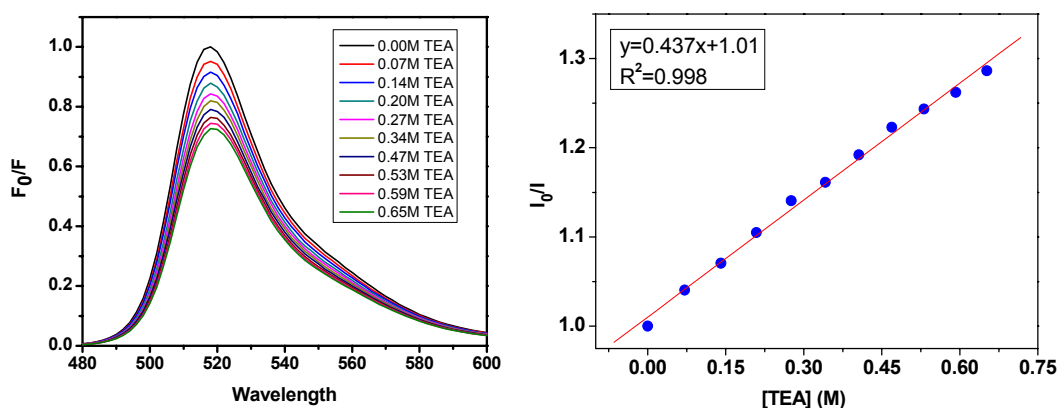

**Figure S3** Family of the emission spectra of fluorescein solution (10  $\mu\text{M}$ ) in 1:1 EtOH/H<sub>2</sub>O solution upon addition of TEA with various concentration at pH 12.51 (left picture) and The best-fit equation of the Stern-Volmer plot (right one).

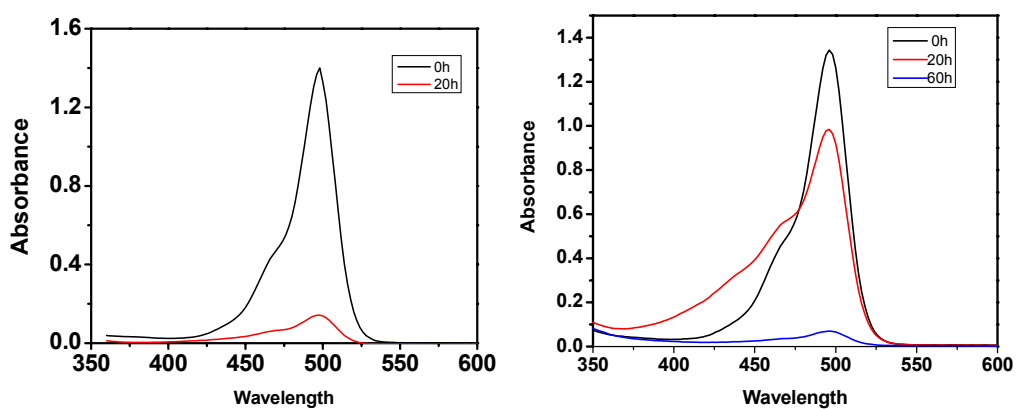

**Figure S4** UV/vis absorption spectra of aliquots taken during the course of the photolysis, Left picture: containing Co-**thiop** (10.0  $\mu\text{M}$ ), Fl (2.0 mM), with 10% of TEA in EtOH/H<sub>2</sub>O. The right one: containing Co-**thiop** (50.0  $\mu\text{M}$ ), Fl (2.0 mM), with 1% of TEA in EtOH/H<sub>2</sub>O .

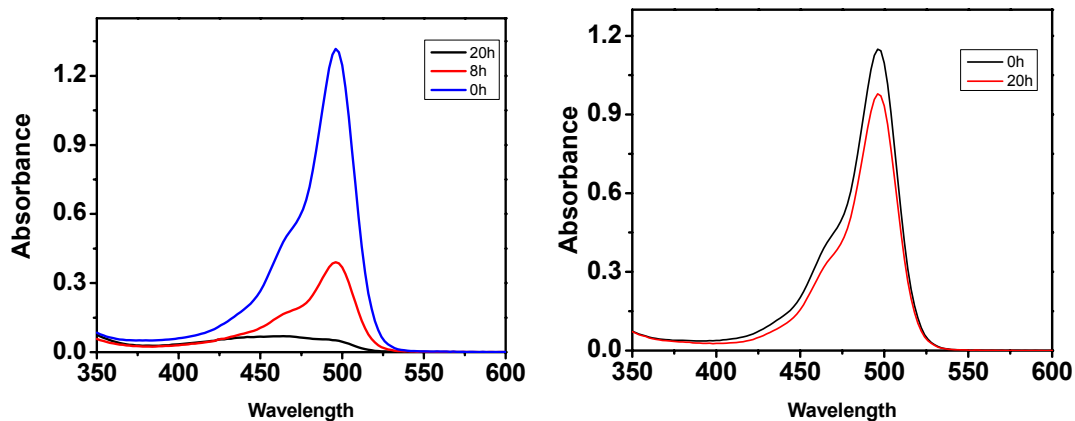

**Figure S5** UV/vis absorption spectra of aliquots taken during the course of the photolysis, Left picture containing Ni-**thiop** (10.0  $\mu\text{M}$ ), Fl (2.0 mM), with 5% of TEA in EtOH/H<sub>2</sub>O. The right one containing Ni-**thiop** (50.0  $\mu\text{M}$ ), Fl (2.0 mM), with 2% of TEA in EtOH/H<sub>2</sub>O.

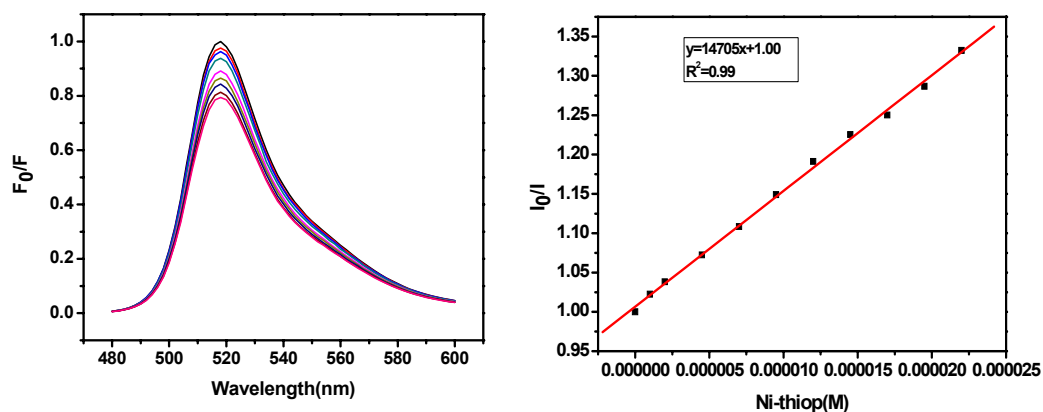

**Figure S6** Family of the emission spectra of fluorescein solution (10  $\mu\text{M}$ ) in 1:1 EtOH/H<sub>2</sub>O solution upon addition of Ni-**thiop** with various concentration at pH 12.51 (left picture) and The best-fit equation of the Stern-Volmer plot (right one).

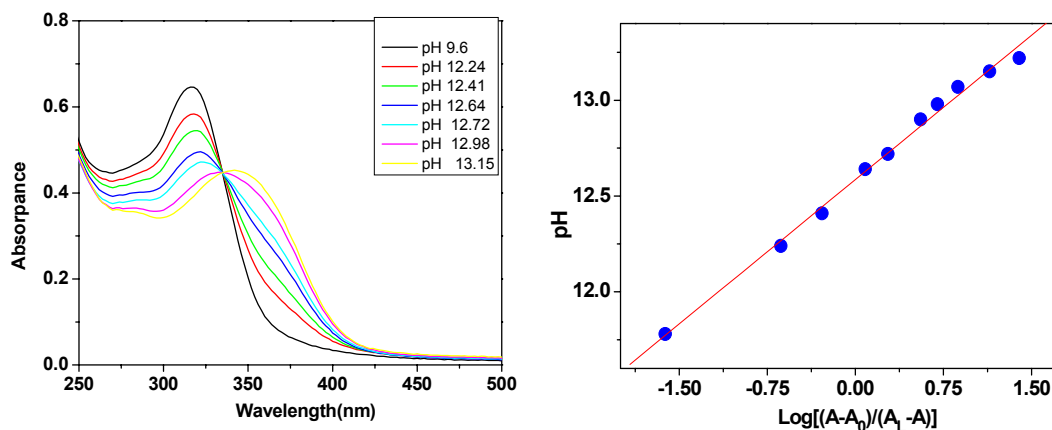

**Figure S7.** Family of Uv-vis absorption spectra of Ni-thiop (20.0  $\mu\text{M}$ ) at different pH values in 1:1 EtOH/H<sub>2</sub>O solution (left picture) and the best-fitting of the titration plot indicating a pKa of 12.58 (right one).

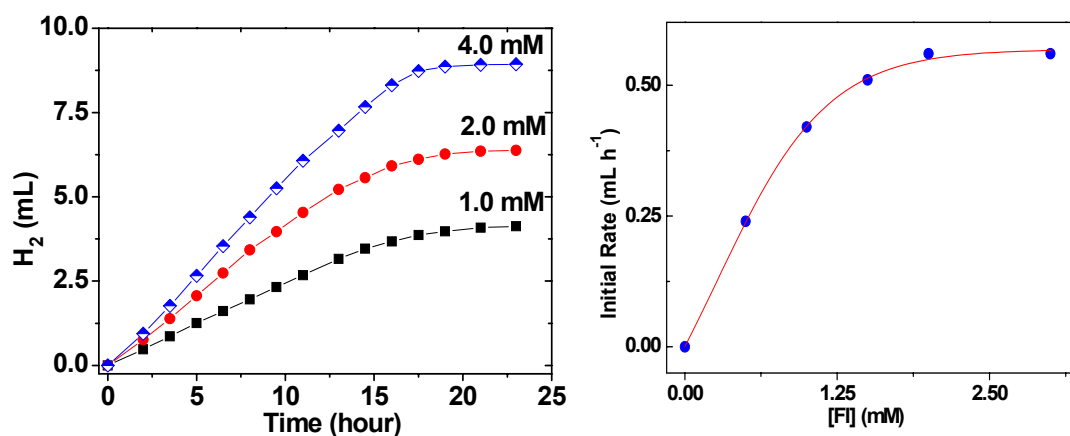

**Figure S8** The volumes and Initial rates of H<sub>2</sub> production in EtOH/H<sub>2</sub>O (1:1) at pH 12.5 with 5% of TEA of systems containing Ni-thiop (10.0  $\mu\text{M}$ ) with the different concentration of F1

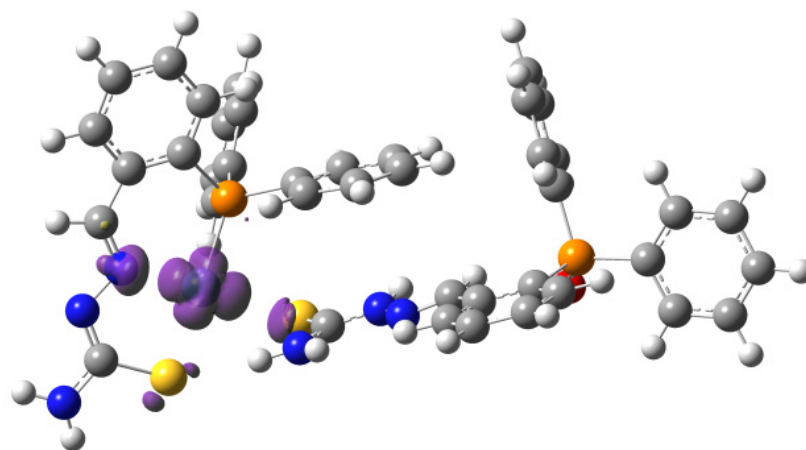

**Figure S9** Spin density of reduced Ni–thioP : isovalue is 0.002 *a.u.* for spin density.

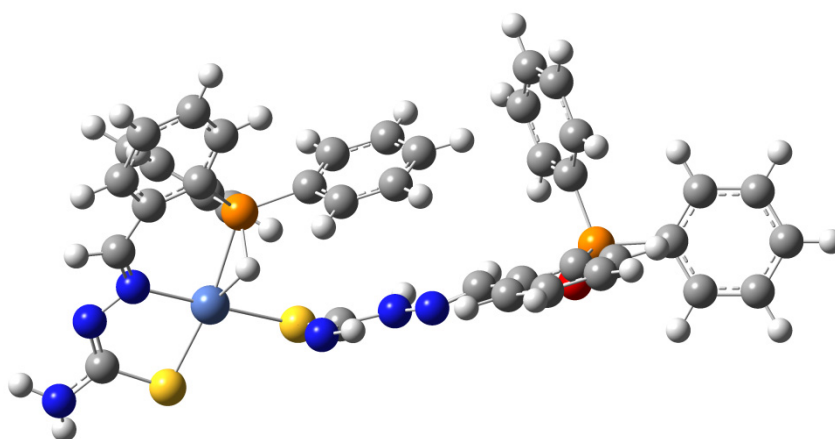

**Figure S10** Potential structure of the proton reduction intermediate of the reduced Ni–thioP
